# Supplementary material
Source: MDPI journal article supplement (https://www.mdpi.com/2073-4433/12/4/520)
Supplement: s1 [file s1]

# Snow Processes and Climate Sensitivity in An Arid Mountain Region, Northern Chile

Francisco Jara <sup>1,\*</sup>, Miguel Lagos-Zúñiga <sup>1,4</sup>, Rodrigo Fuster <sup>2</sup>, Cristian Mattar <sup>3</sup> and James McPhee

<sup>1,4</sup>

<sup>1</sup> Advanced Mining Technology Center, Universidad de Chile, Santiago, 8370448, Chile; [mlagosz@uchile.cl](mailto:mlagosz@uchile.cl) (M. L.-Z.); [jmcphee@uchile.cl](mailto:jmcphee@uchile.cl) (J.M.)

<sup>2</sup> Department of Environmental Sciences and Renewable Natural Resources, Universidad de Chile, Santiago, 8820808, Chile; [rfuster@uchile.cl](mailto:rfuster@uchile.cl)

<sup>3</sup> Department of Natural Sciences and Technology. Universidad de Aysén, Coyhaique, 5952039, Chile; [cmattar@uchile.cl](mailto:cmattar@uchile.cl)

<sup>4</sup> Department of Civil Engineering, Universidad de Chile, Santiago, 8370448, Chile

\* Correspondence: [francisco.jara@uchile.cl](mailto:francisco.jara@uchile.cl)

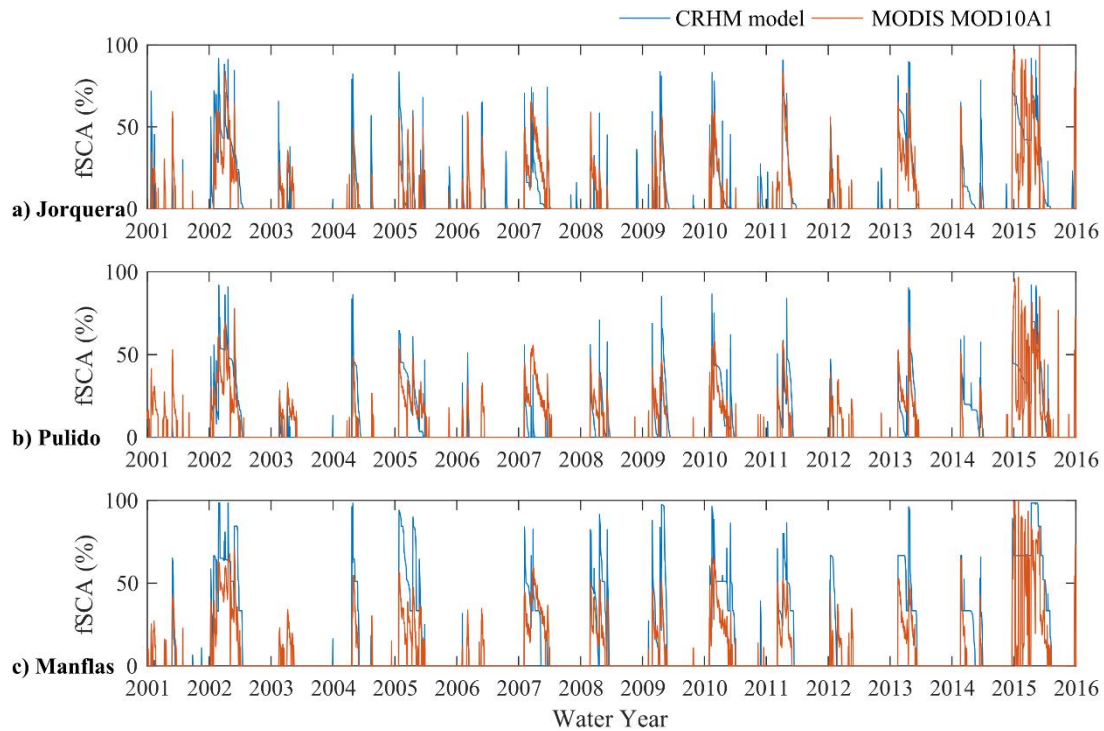

**Figure S1.** Fractional snow cover area derived from the CRHM model and MODIS imagery time series between 2001 and 2016.
